# Supplementary material
Source: MDPI journal article supplement (https://www.mdpi.com/2073-4433/13/8/1299)
Supplement: s1 [file s1]

Article

# Characteristics of Ozone Pollution in Tai'an and Topographic Effects of Mount Tai

Yanzhen Ge <sup>1</sup>, Chunqiang Chen <sup>2</sup>, Yaping Jiang <sup>3</sup>, Tongsuo Yang <sup>2</sup>, Hongyang Kang <sup>4</sup>, Jingzhong Li <sup>1</sup>, Xinran Zhao <sup>1</sup>, Yibo Zhang <sup>3</sup>, Mengying Li <sup>3</sup>, Tangyan Hou <sup>3</sup>, Jianmin Chen <sup>5</sup> and Shaocai Yu <sup>3,\*</sup>

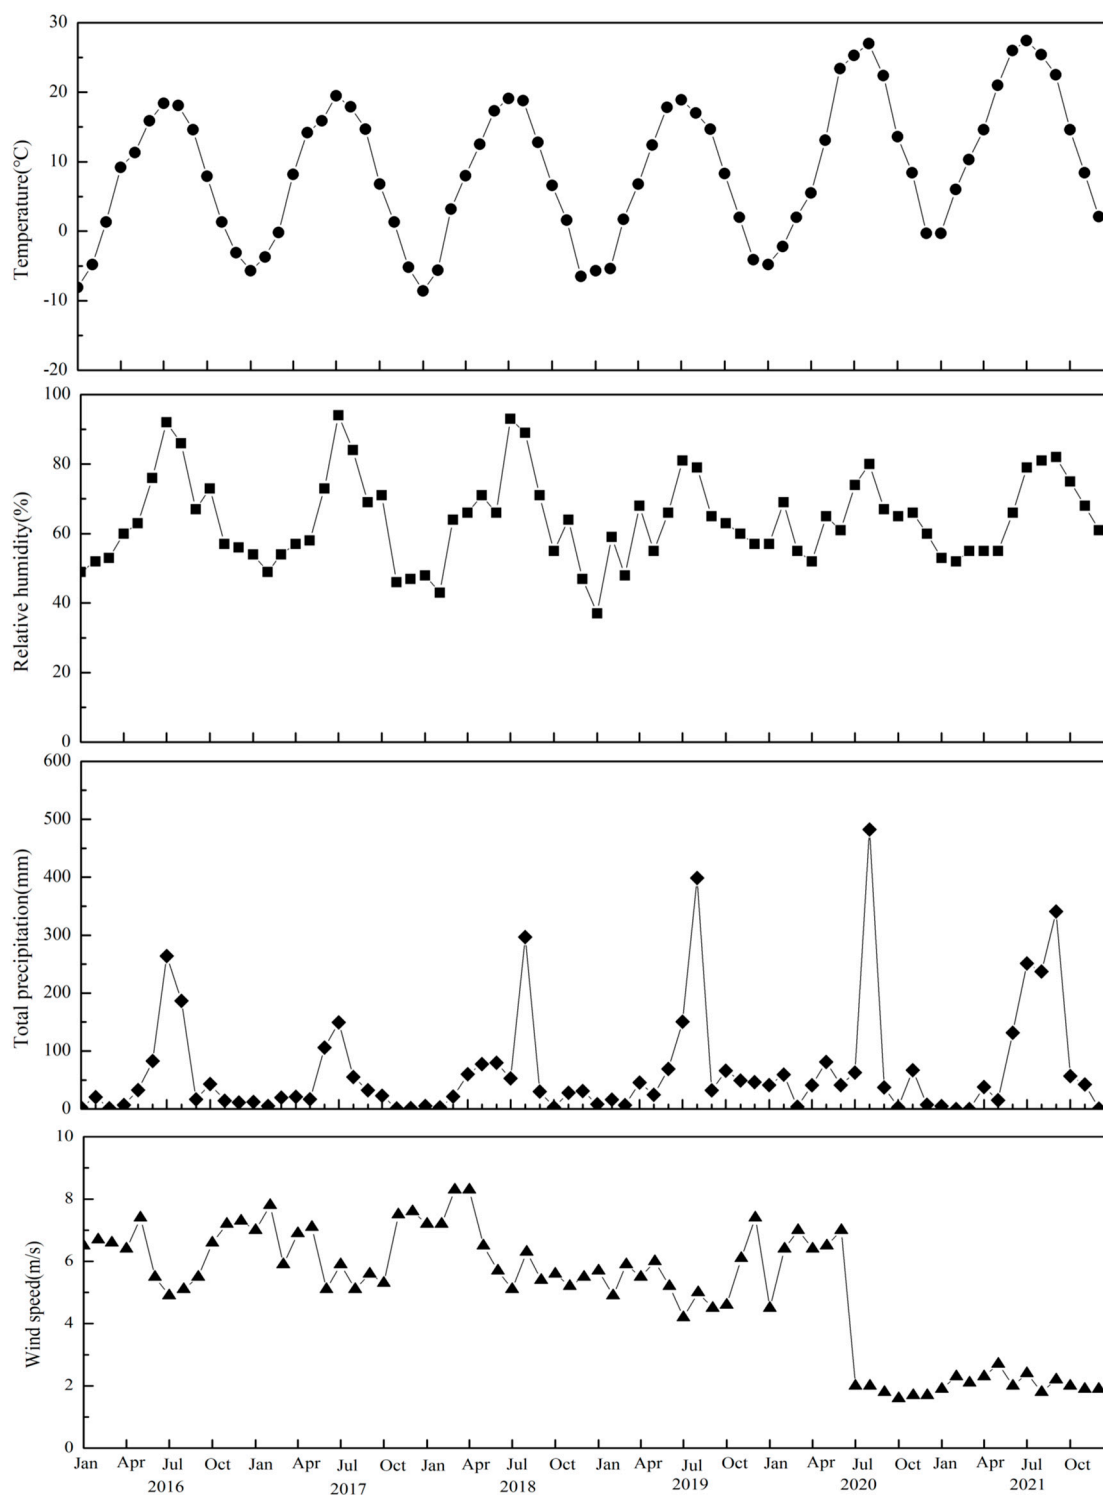

**Figure S1.** The variations of average monthly concentrations of temperature (a), relative humidity (b), precipitation (c), and wind speed (d) in Tai'an from 2016 to 2021.

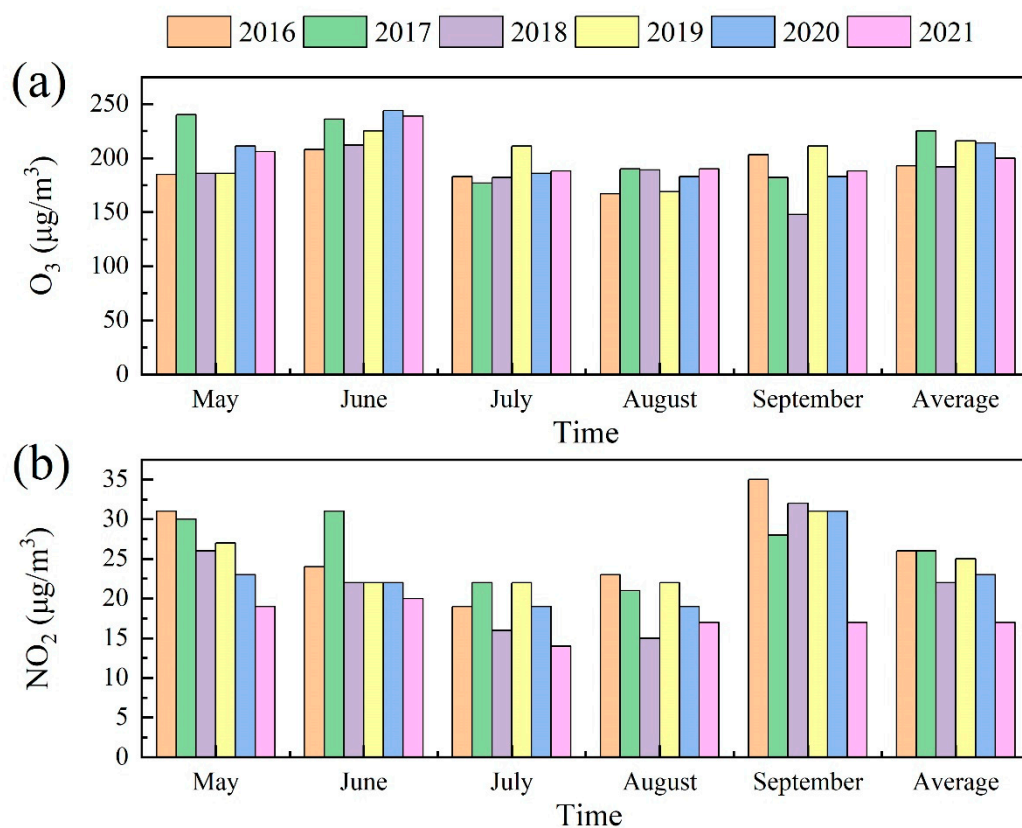

**Figure S2.** The monthly mean concentrations of maximum 8-hour  $O_3$  (a) and  $NO_2$  (b) in Tai'an during May-September from 2016 to 2021.
